# Supplementary material for: Ohmic transition at contacts key to maximizing fill factor and performance of organic solar cells
Source: PubMed Central journal article supplement (PMC6093871; doi:10.1038/s41467-018-05200-w), 2018-08-15
Supplement: 41467_2018_5200_MOESM1_ESM.pdf [file 41467_2018_5200_MOESM1_ESM.pdf]

# Ohmic transition at contacts key to maximizing fill factor and performance of organic solar cells

Jun-Kai Tan,<sup>1,2</sup> Rui-Qi Png,<sup>1,2</sup> Chao Zhao<sup>1,2</sup> and Peter K.H. Ho<sup>1,2\*</sup>

<sup>1</sup> Department of Physics, National University of Singapore, Lower Kent Ridge Road, S117550, Singapore

<sup>2</sup> Solar Energy Research Institute of Singapore, National University of Singapore, Engineering Drive 1, S117574, Singapore

\* Correspondence to: P.K.H.H. (phyhop@nus.edu.sg)

## Supplementary Information

### Contents

|                                                                       |   |
|-----------------------------------------------------------------------|---|
| Supplementary Figure 1                                                | 2 |
| Supplementary Table 1                                                 | 3 |
| Supplementary Note 1: Fermi-Level Pinning and Effective Work Function | 4 |
| Supplementary Note 2: Fermi-Level Pinning Calculations                | 5 |
| Supplementary References                                              | 7 |

## Supplementary Figure 1

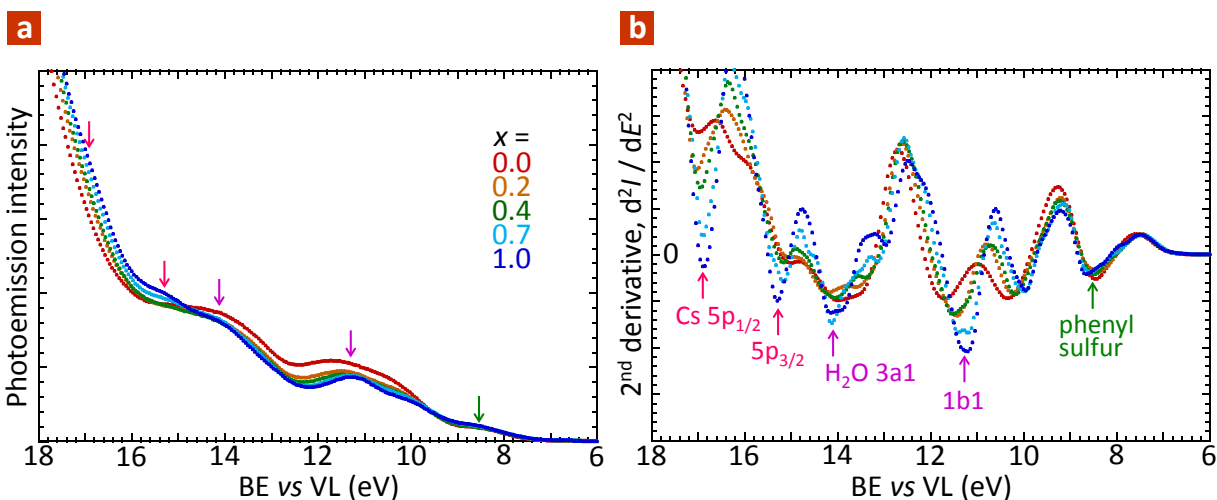

**Supplementary Figure 1. Valence band spectrum of PEDT: PSSCs<sub>x</sub>H<sub>1-x</sub> films.** (a) Valence band spectrum, plotted against binding energy (BE) relative to vacuum level (VL) for film. Arrows indicate peak positions determined from second-derivative spectrum. (b) Second-derivative spectrum, obtained by digital derivatization of the spectrum in (a) with appropriate smoothing. Spectral assignments are marked. Phenyl refers to the localized phenyl MO of PSS; sulfur refers to the localized (lone-pair) sulfur MO of PEDT. Molecular H<sub>2</sub>O is bound to the -SO<sub>3</sub><sup>-</sup>...Cs<sup>+</sup> ion clusters, but not -SO<sub>3</sub>H. The constant energies of these features reveal the absence of any contribution from a varying surface-dipole layer to the work function shift. Assignments are based on Chia et al<sup>1</sup> for phenyl and sulfur and Winter et al for the others.<sup>2</sup>

**Supplementary Table 1**

| Parameter                             |              | $\phi$ (eV) |      |                                                               |      |      |      |
|---------------------------------------|--------------|-------------|------|---------------------------------------------------------------|------|------|------|
|                                       |              | 5.17        | 5.10 | 5.03                                                          | 4.94 | 4.88 | 4.72 |
| Electron mobility                     | $\mu_n$      |             |      | $9 \times 10^{-4} \text{ cm}^2 \text{ V}^{-1} \text{ s}^{-2}$ |      |      |      |
| Hole mobility                         | $\mu_p$      |             |      | $1 \times 10^{-4} \text{ cm}^2 \text{ V}^{-1} \text{ s}^{-2}$ |      |      |      |
| Electron density, at electron contact | $N_n$        |             |      | $2.0 \times 10^{17} \text{ cm}^{-3}$                          |      |      |      |
| Hole density, at hole contact         | $P_p$        | 2.0         | 1.7  | 1.4                                                           | 0.9  | 0.6  | 0.1  |
|                                       |              |             |      | $\times 10^{17} \text{ cm}^{-3}$                              |      |      |      |
| Recombination factor                  | $\xi$        |             |      | 0.2                                                           |      |      |      |
| Zero-K built-in potential             | $V_o$        |             |      | 0.73 V                                                        |      |      |      |
| Dielectric constant                   | $\epsilon_r$ |             |      | 2.0                                                           |      |      |      |

**Supplementary Table 1.** Device parameter set employed for simulation of bulk *JV* characteristics for PEDT: PSSC<sub>S<sub>x</sub></sub>H<sub>1-x</sub>/ P3HT: PCBM/ Ca solar cells. The parameters have been validated in crosslinked donor polymer network: fullerene solar cells with well controlled donor–acceptor morphology over wide thickness range.<sup>3</sup>  $P_p$  is a variable scaled by  $(\phi - \phi_{\text{pin}})$ .

## Supplementary Note 1: Fermi-Level Pinning and Effective Work Function

We use  $\phi$  to denote the vacuum work function of the electrode, in this case PEDT: PSS( $\text{Cs}_x\text{H}_{1-x}$ ), which is the energy difference between its Fermi level (FL) and the outside vacuum level (VL). This can be measured, for example by ultraviolet photoemission spectroscopy (UPS).<sup>4-6</sup> We denote the effective work function of the electrode in contact with the semiconductor by  $\phi_{\text{eff}}$ , which is the energy difference between FL of the electrode and the effective VL of the bulk of the semiconductor.<sup>7</sup> The effective VL is what pertains when the semiconductor is notionally split to create a vacuum interface but without creating a dipole layer at the vacuum interface.  $\phi_{\text{eff}}$  rather than  $\phi$  is the quantity that is relevant to energy-level alignment in devices. It can be inferred from  $V_{\text{bi}}$  measurements in diodes, assuming  $\phi_{\text{eff}}$  at one of the contacts is known *a priori*, for example through systematic correlation.<sup>7</sup> Surveys of polymer organic semiconductor diodes suggest that  $\phi_{\text{eff}}$  is a well-defined and portable under some conditions, in particular in the absence of Fermi-level (FL) pinning.<sup>7</sup> When  $\phi$  exceeds the work function for the onset of FL pinning  $\phi_{\text{pin}}$ , charge transfer to the semiconductor band edge occurs, which opens a VL offset that greatly slows down the creep of FL up the density-of-states of the semiconductor.<sup>8,9</sup> As a consequence  $\phi_{\text{eff}}$  appears to be pinned at  $\phi_{\text{pin}}$ . The location of  $\phi_{\text{pin}}$  can thus be obtained from the interpolated knee in the plot of  $\phi_{\text{eff}}$  against  $\phi$ . The resultant accumulation of carrier density in an ultrathin layer with diffused tail at the semiconductor side of the contact, which we refer to variously as the ‘ $\delta$ -doped layer’ or ‘ $\delta$ -density’, can be measured and quantified by subgap electroabsorption spectroscopy.<sup>10</sup>

## Supplementary Note 2: Fermi-Level Pinning Calculations

Calculations were performed at 290 K with the following parameters:

| Parameter                        | Symbol       | Value                              |
|----------------------------------|--------------|------------------------------------|
| Gaussian density-of-states       | $\sigma_G$   | $3 \times 10^{13} \text{ cm}^{-2}$ |
| Static dielectric constant       | $\epsilon_r$ | 2.0 <sup>a</sup>                   |
| Effective dielectric thickness   | $d$          | 2.5 nm                             |
| Contact double-layer capacitance | $C_{dl}$     | $0.7 \mu\text{F cm}^{-2}$          |

Footnotes:

<sup>a</sup> We used a  $\epsilon_r$  lower than 3 because of the absence of the conjugated polymer in the local ion cluster.

In a typical calculation, a certain density-of-states (DOS) function for the semiconductor is assumed. Then for each assumed effective work function of the hole contact  $\phi_{\text{eff}}$  given by the work function for the semiconductor, we computed the vacuum-level offset at the contact  $\Delta\phi_{\text{dl}}$  and the associated work function of the electrode  $\phi$ , according to:  $\phi = \phi_{\text{eff}} + \Delta\phi_{\text{dl}}$ .  $\Delta\phi_{\text{dl}}$  is given by the voltage drop associated with the double-layer capacitance due to the accumulated hole density and its image, which in the zero-K limit is given by:  $\Delta\phi_{\text{dl}} = \frac{e\sigma}{C_{\text{dl}}}$ , where  $\sigma$  is the accumulated hole density given by  $\sigma = \int_{\epsilon_F}^{\infty} N_i(\epsilon_i)(1-f_i(\epsilon_i))d\epsilon_i$ , where  $N_i(\epsilon_i)$  is the DOS and  $f_i(\epsilon_i)$  is the Fermi-Dirac function, and  $C_{\text{dl}}$  is the double-layer capacitance given by  $C_{\text{dl}} = \frac{\epsilon_0\epsilon_r}{d}$ , where  $\epsilon_0$  is the vacuum permittivity,  $\epsilon_r$  is the local dielectric constant, and  $d$  is the effective double-layer thickness. For an interface with a perfect conductor,  $d$  is given by half the distance to the image charge. We have checked that a variation in  $\Delta\phi_{\text{dl}}$  by up to a factor of three, due to uncertainty in  $C_{\text{dl}}$ , does not change the form of the plots. The FL pinning onset work function  $\phi_{\text{pin}}$  is established from the kink in the  $\phi_{\text{eff}}$  vs  $\phi$  plot. This was computationally obtained by intersecting the unity-slope

straight line in the  $\phi < \phi_{\text{pin}}$  regime, with a straight line fitted over  $\phi_{\text{pin}} + 0.1 < \phi < \phi_{\text{pin}} + 0.4$  eV regime, following the usual experimental practice.

For a DOS with a hemi-gaussian frontier region with integrated hemi-gaussian DOS of  $4 \times 10^{13}$   $\text{cm}^{-2}$ , our simulation gives  $\phi_{\text{pin}} \approx (2.35 \pm 0.02) * \sigma_G$ , where  $\sigma_G$  is the gaussian (standard deviation) width. For comparison, the ionization energy  $I_E$  conventionally defined by extrapolated onset of the highest-occupied molecular orbital (HOMO) band edge is at  $2.00 * \sigma_G$ . Therefore in the absence of polarization-induced band-bending, Fermi-level pinning is expected to occur very close to the conventionally-defined band edge, at *ca.*  $0.35 * \sigma_G$  into the gap from the band edge. This amounts to 63 meV for a typical  $\sigma_G$  of 0.18 eV. Furthermore, we found for  $\sigma_G$  of 0.18 eV that contact resistivity scales as:  $\rho_c \sim \sigma^{-0.82}$  for  $\phi$  in the range of  $\phi_{\text{pin}} \pm 0.2$  eV.

## Supplementary References

- 1 Chia, P. J. *et al.* Direct evidence for the role of the Madelung potential in determining the work function of doped organic semiconductors. *Phys. Rev. Lett.* **102**, 096602 (2009).
- 2 Winter, B. *et al.* Electron binding energies of aqueous alkali and halide ions: euv photoelectron spectroscopy of liquid solutions and combined ab initio and molecular dynamics calculations. *J. Am. Chem. Soc.* **127**, 7203 (2005).
- 3 Liu, B., Png, R. Q., Tan, J. K. & Ho, P. K. H. Evaluation of built-in potential and loss mechanisms at contacts in organic solar cells: device model parameterization, validation, and prediction. *Adv. Energy Mater.* **4**, 1200972 (2014).
- 4 Koch, N. Organic electronic devices and their functional interfaces. *ChemPhysChem* **8**, 1438 (2007).
- 5 Braun, S., Salaneck, W. R. & Fahlman, M. Energy-level alignment at organic/metal and organic/organic interfaces. *Adv. Mater.* **21**, 1450 (2009).
- 6 Hwang, J., Wan, A. & Kahn, A. Energetics of metal–organic interfaces: new experiments and assessment of the field. *Mater. Sci. Eng. R-Rep.* **64**, 1 (2009).
- 7 Zhou, M. *et al.* Effective work functions for the evaporated metal/organic semiconductor contacts from in-situ diode flatband potential measurements. *Appl. Phys. Lett.* **101**, 013501 (2012).
- 8 Ishii, H., Sugiyama, K., Ito, E. & Seki, K. Energy level alignment and interfacial electronic structures at organic/ metal and organic/ organic interfaces. *Adv. Mater.* **11**, 605 (1999).
- 9 Tengstedt, C. *et al.* Fermi-level pinning at conjugated polymer interfaces. *Appl. Phys. Lett.* **88**, 053502 (2006).
- 10 Zhou, M. *et al.* The role of delta-doped interfaces for Ohmic contacts to organic semiconductors. *Phys. Rev. Lett.* **103**, 036601 (2009).
